# Supplementary material
Source: Royal Society of Chemistry journal article supplement (doi:10.1039/d6ce00090h)
Supplement: d6ce00090h1.pdf [file d6ce00090h1.pdf]

**Electronic Supplementary Information (ESI) for**

**Influence of Point Defects on the Optical Properties of  $\text{La}_3\text{Nb}_{0.5}\text{Ga}_{5.5}\text{O}_{14}$  crystals**

Jindong Chen <sup>a, \*</sup>, Hongxu Gu,<sup>b</sup> Shusen Yang<sup>a</sup>, Ning Ye <sup>a, \*</sup>, Kui Wu,<sup>b</sup> Dazhi Lu <sup>b, \*</sup>

<sup>a</sup> State Key Laboratory of Crystal Materials, Tianjin Key Laboratory of Functional Crystal Materials, Institute of Functional Crystal, College of Materials Science and Engineering, Tianjin University of Technology, Tianjin 300384, China

<sup>b</sup> State Key Laboratory of Crystal Materials and Institute of Crystal Materials, Shandong University, Jinan250100, China

\*E-mail: [cjd1225@email.tjut.edu.cn](mailto:cjd1225@email.tjut.edu.cn), [nye@email.tjut.edu.cn](mailto:nye@email.tjut.edu.cn), [dazhi.lu@sdu.edu.cn](mailto:dazhi.lu@sdu.edu.cn)

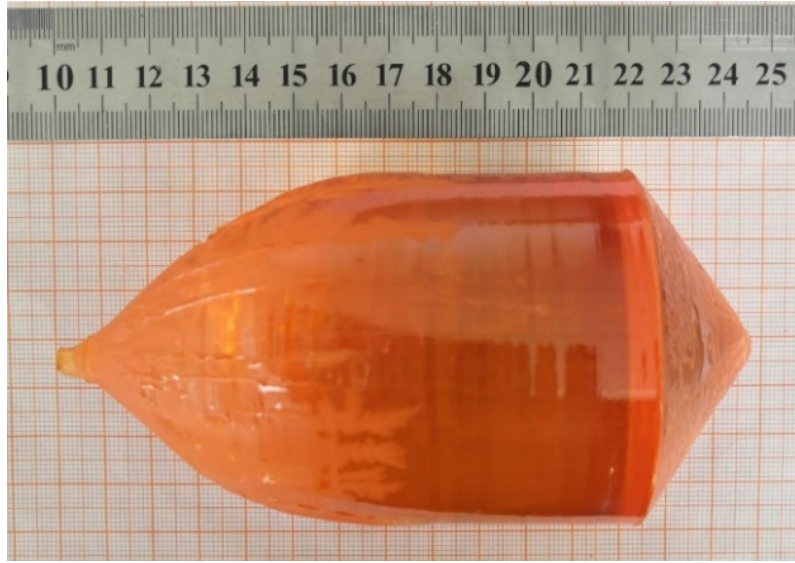

Figure S1. Photograph as-grown LGN single crystal under  $N_2+ 2\%O_2$  atmospheres

We used the DFT as implemented in the WienNb Ab initio simulation package (VASP) for defect formation energy calculations. The exchange-correlation potential is described by using the generalized gradient approximation of Perdew-Burke-Ernzerhof (GGA-PBE). The projector augmented-wave (PAW) method is employed to treat interactions between ion cores and valence electrons. The plane-wave cutoff energy was fixed to 400 eV. Given structural models were relaxed until the Hellmann-Feynman forces smaller than  $-0.01$  eV/Å and the change in energy smaller than  $10^{-7}$  eV was attained.

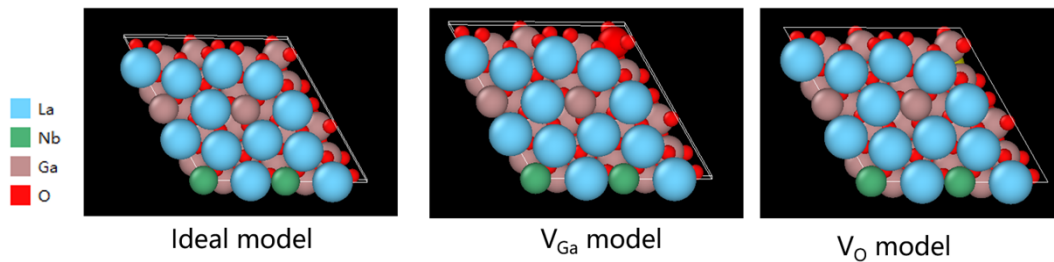

Figure S2. Structure models for defect formation energy calculations.

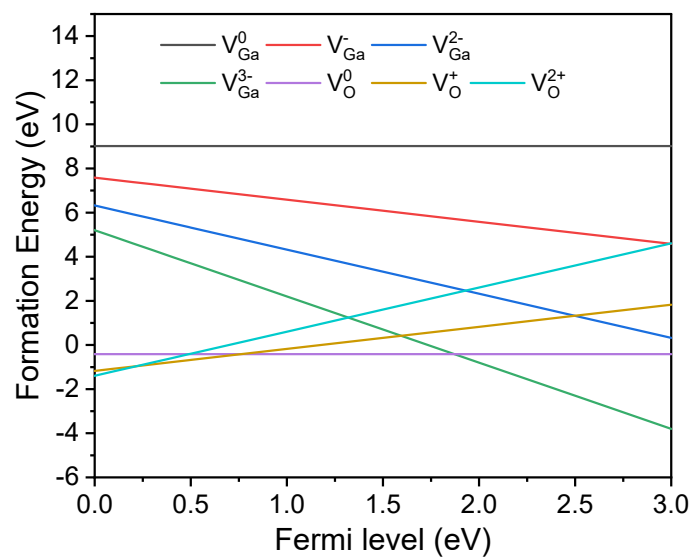

Figure S3. Defect formation energy of oxygen and gallium vacancies
